# Supplementary material for: Expression and Functional Properties of an Anti-Triazophos High-Affinity Single-Chain Variable Fragment Antibody with Specific Lambda Light Chain
Source: MDPI journal article supplement (doi:10.3390/ijms17060823), 2016-06-07
Supplement: s1 [file s1]

# Supplementary Materials: Expression and Functional Properties of an Anti-Triazophos High-Affinity Single-Chain Variable Fragment Antibody with Specific Lambda Light Chain

Rui Liu, Xiao Liang, Dandan Xiang, Yirong Guo, Yihua Liu and Guonian Zhu

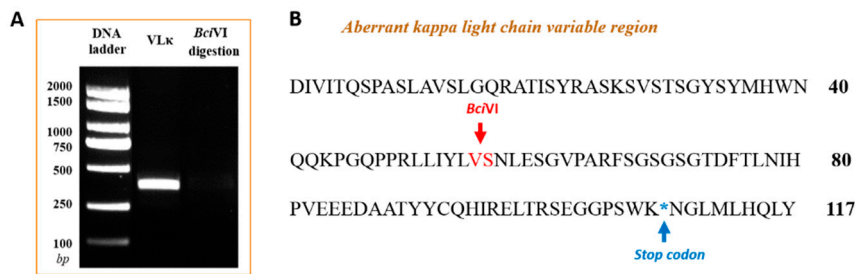

**Figure S1.** Amplification of the variable gene with primer set for the kappa light chain. (A) The aberrant VL $\kappa$  fragment of the anti-triazophos mAb-8C10 gene was amplified and could be digested by the *BciVI* restriction enzyme [30]; and (B) deduced amino acid sequence of an aberrant premature VL $\kappa$  fragment.

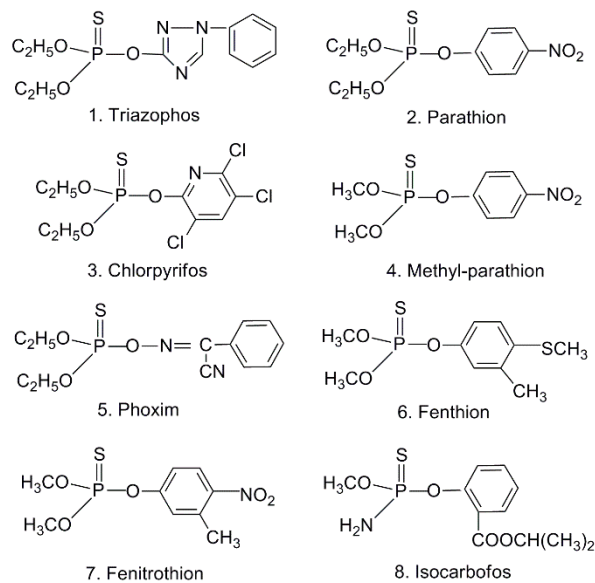

**Figure S2.** Chemical structures of triazophos and related compounds used in ic-ELISA.

**Table S1.** The primer set for the amplification of variable fragment of the kappa light chain.

| Name          | Sequence (5'-3')         | Annotation             |
|---------------|--------------------------|------------------------|
| VL $\kappa$ F | GAYATTGTGMTSACMCARWCTMCA | kappa light chain [43] |
| VL $\kappa$ R | GGATACAGTTGGTGCAGCATC    |                        |
